# Supplementary material for: Enhanced School-Based Vision Screening in Kumasi, Ghana: A Pilot Study to Assess Feasibility
Source: Research Square preprint supplement (doi:10.21203/rs.3.rs-7852103/v1), 2025-11-26
Supplement: Supplementary file 1 [file 7d3508612c4212d9ee58267f.docx]

Supplementary Materials

Table 1. Age-based referral criteria used for GO-SCREEN

| ARF or Refractive Error | Age | Threshold |
| --- | --- | --- |
| ARF (severity ranked) |  |  |
| Media opacity | All ages | > 0.1mm |
| Strabismus | All ages | > 8 PD manifest |
| Anisometropia | All ages | > 1.25 D |
| Hyperopia | All ages | > 4.00 D |
| Astigmatism | < 4 years | > 3.00 D |
| Visually Significant Refractive Errors |  |  |
| Astigmatism | ≥ 4 years | > 1.75 D |
| Myopia | < 4 years | < -3.00 D |
| Myopia | ≥ 4 years | < -2.00D |

Abbreviations: ARF, amblyopia risk factor; D, diopters; PD, prism diopters. Note. American Academy of Pediatric Ophthalmology and Strabismus (AAPOS) uniform guidelines for instrument-based pediatric vision screen validation 2021 by Arnold et al.1

1. Age-dependent critical line for visual acuity testing

| Age (months) | Visual Acuity Critical Line to Pass |
| --- | --- |
| 36 – 47 | 20/50 |
| 48-59 | 20/40 |
| ≥60 | 20/30 (or 20/32 line on some charts) |

Note. “Procedures for the Evaluation of the Visual System by Pediatricians” 2016 by Donahue et al. 2

1. Referral guidelines for physical and functional vision screening tests

| Recommended Tests | Function | Referral Indication |
| --- | --- | --- |
| Red Reflex | Ocular media clarity | Absent, white, dull, opacified or asymmetric red reflex |
| Direct observation | External inspection | Any external abnormality |
| Flashlight | Pupil Examination | Pupil of irregular shape, unequal size, or unequal reaction to light |
| Cover-uncover test | Ocular alignment | Any refixation movement on cover test |
| Ocular motility test | Ocular alignment and coordination | No or restricted eye movement on ocular motility testing |

Note. Adapted from “Procedures for the Evaluation of the Visual System by Pediatricians” 2016 by Donahue et al. 2 Children who could not complete any of the screening tests after two screening attempts or with a two-line difference in visual acuities between the eyes were also referred.

Table 2. Types and proportions of ocular disorders (by type of school) identified following vision screening*

| Ocular disorders n (%)  (n= 382) | | **Type of School n (%)** | |
| --- | --- | --- | --- |
| Public  (n= 123) | Private  (n=259) |
| Non-refractive** | 234 (61.26) | 87 (70.73) | **147 (56.76)** |
| - Ocular adnexa | 10 (2.62) | 2 (1.63) | 8 (5.44) |
| - Anterior Segment | 14 (3.66) | 11 (8.94) | 3 (2.04) |
| - Posterior Segment | 210 (54.97) | 73 (59.35) | 137 (93.20) |
| - Ocular Motility | 1 (0.26) | 1 (0.81) | 0 (0.00) |
| - Ocular Alignment | 6 (1.57) | 2 (1.63) | 4 (2.72) |
| Refractive | 178 (46.60) | 42 (34.15) | 131 (56.96) |
| - Myopia | 26 (6.81) | 2 (1.63) | 24 (18.32) |
| - Hyperopia | 15 (3.93) | 2 (1.63) | 13 (9.92) |
| - Astigmatism | 82 (21.47) | 17 (13.82) | 65 (49.62) |
| - Anisometropia | 69 (18.06) | 24 (19.51) | 45 (34.35) |

* Children were counted in both groups if they had both non-refractive and refractive ocular disorders. **Non-refractive ocular disorders were categorized based on structure and function. **Proportions** represent column percentages

**Sociodemographic Factors Associated with Vision Care for School Children in Kumasi, Ghana:**

**In Person Interview with Children to Assess Follow-Up**

School:_______________________ Student’s Class :___________________ Code Number ________

**Question to Interviewer:**

Is the child wearing glasses?

□ Yes, the child is wearing glasses during the interview

□ No, the child is not wearing glasses

**Questions for Student:**

1. We checked your eyes about 6 months ago at school for eye problems. Since then, has an eye doctor checked your eyes?

□ Yes, an eye doctor has checked my eyes

□ No, an eye doctor has not checked my eyes

□ I don’t remember if an eye doctor has checked my eyes

1. Why has a doctor not checked your eyes?

□ My parents said it's too expensive

□ My parents have not had time to take me

□ My parents do not want me to wear glasses

□ My parents do not know where they can take me for eye test

□ I do not know why my parents have not taken me to an eye clinic

□ Other reason (pls write) ____________________________________________________________

__________________________________________________________________________________

□ An eye doctor has checked my eyes since the screening at school 6 months ago

1. Did the eye doctor say you needed to buy glasses to wear?

□ Yes, the eye doctor says I need to buy glasses

□ No, the eye doctor did not say I need to buy glasses

□ I don’t remember if the eye doctor said I need to buy glasses

□ I have not had my eyes checked by an eye doctor

1. Have your parents bought the eyeglasses for you?

□ Yes, my parents have bought the eyeglasses for me

□ No, my parents have not bought the eyeglasses for me

□ The eye doctor did not say I needed glasses or I don’t remember if the eye doctor said I need glasses
